# Supplementary material for: Perceived Trauma During Hospitalization and Treatment Participation Among Individuals With Psychotic Disorders
Source: Atypon-hosted journal article supplement (doi:10.1176/appi.ps.201200556), 2014-02-01
Supplement: 266_ds001.pdf [file 266_ds001.pdf]

## APPENDIX

### 1. Supplemental information on study sample

Patients presenting at any of the 12 inpatient psychiatric facilities in Suffolk County were selected for inclusion if they were between 15 and 60 years old, residing in Suffolk County, and experiencing symptoms of psychosis.

Patients were excluded if their first psychiatric hospitalization was more than six months before the index admission, their psychosis had a medical cause other than substance abuse, or they were unable to provide informed consent.

Signed releases for hospital and clinic records were obtained at each interview. The baseline cohort included 628 patients. Of the 586 participants alive at the 10-year follow-up, 470 were successfully contacted. Information about the 10-year follow-up sample has been published previously (2).

### 2. Supplemental information on participant characteristics

Consensus diagnosis was based on the Structured Clinical Interview for DSM-III-R (SCID) (3), which was administered at each follow-up interview. Social class of origin was ranked according to the occupation of the head of household of origin and has been described elsewhere (5). Rehospitalizations and state hospital admission were determined on the basis of available information at each follow-up. To account for intervals during which hospitalization information

was missing, rehospitalization rate was calculated per 10 observed follow-up years. Illness course was derived from the WHO rating of illness course (6).

Sample characteristics are presented in Table A1. The median age at baseline was 27 years (IQR: 21-34). The majority of the sample was male (57%) and white (73%). At baseline, 50% of participants had been living independently and 36% were employed or in school full-time. The diagnostic distribution at the two year follow up was: schizophrenia spectrum disorder (39%), bipolar disorder with psychotic features (27%), and other psychotic disorders (35%). Participants' first admissions were in community hospitals (33%), a university hospital (32%), two state hospitals (31%), and an "other" category (children's hospital, Veterans Affairs hospital, etc., 4%). At the 10-year follow-up, 49% had a high school education or less, 44% had ever been married, and 37% had experienced full remission. Over follow-up, 33% of participants were never rehospitalized and 45% were hospitalized in a state facility at least once.

To examine possible effects of attrition, we compared the study sample to those who were alive at year 10 but did not participate in the trauma module. The two groups were similar on all characteristics in Table A1 except for 10-year BPRS score, with non-participants having a higher mean BPRS score (44 vs. 30,  $t=5.677$ ,  $df=356$ ,  $p<.001$ ), indicating greater severity of symptoms.

Associations between participant characteristics and perceived trauma are presented in Table A2.

**Table A1: Characteristics of 395 participants admitted for a first episode of psychosis and followed over 10 years**

| <b>Baseline characteristics</b>            | <b>n</b> | <b>%</b> |
|--------------------------------------------|----------|----------|
| Sex                                        |          |          |
| Male                                       | 226      | 57       |
| Female                                     | 169      | 43       |
| Race                                       |          |          |
| Non-Hispanic white                         | 290      | 73       |
| Non-Hispanic black                         | 65       | 17       |
| Hispanic, Asian, American Indian           | 40       | 10       |
| Social Class of origin                     |          |          |
| High                                       | 109      | 31       |
| Medium                                     | 148      | 42       |
| Low                                        | 93       | 27       |
| Living independently at baseline           |          |          |
| Independent                                | 196      | 50       |
| Not independent                            | 197      | 50       |
| Baseline work/school status                |          |          |
| Full time                                  | 141      | 36       |
| Part time                                  | 54       | 14       |
| None                                       | 170      | 43       |
| Homemaker                                  | 28       | 7        |
| Diagnosis                                  |          |          |
| Schizophrenia spectrum disorder            | 150      | 39       |
| Bipolar disorder                           | 105      | 27       |
| Other psychotic disorder                   | 134      | 35       |
| Baseline insurance status                  |          |          |
| No insurance                               | 178      | 45       |
| Private insurance                          | 150      | 38       |
| Public insurance                           | 67       | 17       |
| 1 <sup>st</sup> inpatient admission status |          |          |
| Voluntary                                  | 148      | 42       |
| Involuntary                                | 206      | 58       |
| 1 <sup>st</sup> inpatient facility type    |          |          |
| Community                                  | 131      | 33       |
| State                                      | 121      | 31       |

|                                    |          |          |
|------------------------------------|----------|----------|
| University                         | 128      | 32       |
| Other                              | 15       | 4        |
| Age at 1st admission (median, IQR) | 27       | 21-34    |
| <b>10 year characteristics</b>     | <b>n</b> | <b>%</b> |
| <hr/>                              |          |          |
| 10-year remission status           |          |          |
| Full remission                     | 144      | 37       |
| Partial or No remission            | 248      | 63       |
| State hospital admission over 10y  |          |          |
| Any state hospitalization          | 178      | 45       |
| None or unknown                    | 217      | 55       |
| 10-year marital status             |          |          |
| Never married                      | 208      | 53       |
| Ever married                       | 187      | 47       |
| 10-year education level            |          |          |
| High school or less                | 193      | 49       |
| More than high school              | 201      | 51       |
| Rehospitalizations per 10y         |          |          |
| 0                                  | 131      | 33       |
| 1-2                                | 116      | 29       |
| >2                                 | 148      | 38       |
| 10-year BPRS score (median, IQR)   | 28       | 22-36    |

Note: percents are calculated out of number with observed responses

**Table A2: Adjusted associations between participant characteristics and perceptions of hospitalization-related trauma**

| <b>Baseline characteristics</b>                                      | <b>aOR</b> | <b>95% CI</b> | <b>p</b> |
|----------------------------------------------------------------------|------------|---------------|----------|
| Female (reference: male)                                             | 1.97       | 1.19-3.27     | .009     |
| Race (reference: non-Hispanic white)                                 |            |               |          |
| Non-Hispanic black                                                   | .54        | 0.28-1.02     | .057     |
| Hispanic, Asian, American Indian                                     | 1.19       | .52-2.73      | .680     |
| Social class of origin (reference: medium)                           |            |               |          |
| High                                                                 | .91        | .49-1.70      | .774     |
| Low                                                                  | .77        | .40-1.46      | .419     |
| Not independent at baseline (reference: independent)                 | .81        | .50-1.32      | .405     |
| Baseline work/school status (reference: full time)                   |            |               |          |
| Part time                                                            | 1.37       | .64-2.95      | .423     |
| None                                                                 | 1.38       | .80-2.40      | .247     |
| Homemaker                                                            | 6.05       | 1.33-27.43    | .020     |
| Diagnosis (reference: schizophrenia spectrum)                        |            |               |          |
| Bipolar disorder                                                     | 1.48       | .76-2.88      | .246     |
| Other psychotic disorder                                             | .88        | .50-1.55      | .656     |
| Baseline insurance (reference: none)                                 |            |               |          |
| Private                                                              | 1.01       | .59-1.73      | .965     |
| Public                                                               | .84        | .43-1.66      | .622     |
| Involuntary 1 <sup>st</sup> admission (reference: voluntary)         | 1.54       | .91-2.60      | .104     |
| Age at first admission                                               | 1.00       | .97-1.02      | .908     |
| <b>10-year characteristics</b>                                       |            |               |          |
| Partial or no remission (reference: full remission)                  | .69        | .36-1.34      | .276     |
| Any state hospitalization over 10 years (reference: none or unknown) | 1.22       | .74-2.01      | .434     |
| More than high school education (reference: high school or less)     | 1.20       | .73-1.95      | .470     |
| Ever married (reference: never married)                              | .95        | .59-1.55      | .841     |

Note: Models are adjusted for 10-year BPRS score and rate of rehospitalization during follow-up. The abbreviation aOR stands for adjusted odds ratio, CI for confidence interval.

### 3. Specific experiences, reaction to worst hospitalization, and perceived trauma

To assess the psychological impact of trauma experiences, participants were asked the following about their “worst” or most upsetting hospitalization: a) whether he/she *believed* that he/she or someone else could have been killed or seriously harmed; b) whether he/she or someone else *was* seriously harmed; c) whether he/she experienced feelings of intense helplessness, fear or horror; d) how much the experience upset him/her either at the time or later on (a lot vs. none or somewhat); and e) how much the experience interfered with his/her life or daily activities or caused problems with family or friends (a lot vs. none or somewhat). The number of different distressing experiences reported was measured as a count variable ranging from 0 to 8. For this variable, experiences with missing responses were classified as not present unless responses for all experiences were missing, in which case the count was set to missing.

Table A3 shows the distributions of specific experiences, number of experiences, and reactions to worst hospitalization, by perceived trauma. Participants who reported perceived trauma were more likely to report each of the specific experiences than those who did not. Participants who reported perceived trauma were less likely to report no specific experiences (13.9% vs. 52.2%) and more likely to report 1-2 or 3 or more specific experiences (42.5% vs. 35.9% and 43.6% vs. 12.0%, respectively) than those who did not report perceived trauma.

Participants who reported perceived trauma were also more likely to report each negative reaction and were especially more likely to report helplessness, fear or horror (73.3% vs. 19.8%) and being bothered or upset “a lot” by their experience (65.1% vs. 11.0%). All differences were statistically significant. Although DSM PTSD criteria were not assessed in this study, we operationalized Criterion A1 and A2 using questions a, b and c described above. Among those who reported that any of their admissions were traumatic, 39% also met A1 and A2 criteria (endorsing either item a or b above, plus item c).

**Table A3: Distribution of specific experiences, number of experiences, and reaction to worst hospitalization by perceived trauma**

|                                   | Overall |    | Trauma<br>(n=268, 69%) |    | No trauma<br>(n=121, 31%) |    |
|-----------------------------------|---------|----|------------------------|----|---------------------------|----|
|                                   | n       | %  | n                      | %  | n                         | %  |
| Experience                        |         |    |                        |    |                           |    |
| Hospitalized against will         | 217     | 62 | 182                    | 72 | 33                        | 37 |
| Put in restraints                 | 142     | 40 | 123                    | 48 | 19                        | 21 |
| Put in seclusion                  | 74      | 21 | 62                     | 24 | 12                        | 13 |
| Physical abuse by staff           | 22      | 6  | 21                     | 8  | 1                         | 1  |
| Physical abuse by patients        | 30      | 9  | 27                     | 11 | 3                         | 3  |
| Threatened or endangered          | 72      | 20 | 66                     | 26 | 6                         | 7  |
| Forced medication                 | 130     | 37 | 119                    | 46 | 11                        | 12 |
| Overcrowding                      | 64      | 18 | 60                     | 24 | 4                         | 4  |
| Number of different experiences   |         |    |                        |    |                           |    |
| 0                                 | 88      | 25 | 36                     | 14 | 48                        | 52 |
| 1-2                               | 145     | 41 | 110                    | 43 | 33                        | 36 |
| 3+                                | 124     | 35 | 113                    | 44 | 11                        | 12 |
| Reaction to worst hospitalization |         |    |                        |    |                           |    |
| Believe could be killed/harmed    | 121     | 35 | 106                    | 42 | 15                        | 16 |
| Serious harm occurred             | 34      | 10 | 32                     | 12 | 2                         | 2  |
| Helplessness, fear, horror        | 207     | 59 | 189                    | 73 | 18                        | 20 |
| Bother/upset a lot                | 176     | 51 | 166                    | 65 | 10                        | 11 |
| Interfere a lot                   | 137     | 40 | 127                    | 50 | 10                        | 11 |

Note: percents calculated out of number with observed responses. “Trauma” refers to those who reported perceived trauma associated with any hospitalizations, while “No trauma” refers to those who did not report perceived trauma.

#### 4. Sensitivity analysis

We included a sensitivity analysis to assess whether any detected associations may have been influenced by paranoid ideation. Logistic regression was used to evaluate whether the 10-year BPRS “suspiciousness” item was



associated with perceived trauma or with any specific experience. Based on these results, potential confounding of reported associations by paranoid ideation was assessed. This process was repeated using a summary variable representing paranoid ideation over the course of follow-up.

Results of the sensitivity analysis indicated that neither suspiciousness at the 10 year interview, nor participants' history of suspiciousness at any time over follow-up, was significantly associated with perceived trauma. Suspiciousness rating at 10 years was associated with reporting forced medication, but adjustment for suspiciousness did not yield estimates that were appreciably different from those reported in Table 1 (available by request).

## 5. References

1. Bromet EJ, Schwartz JE, Fennig S, et al: The epidemiology of psychosis: The Suffolk County mental health project. *Schizophrenia bulletin* 18:243, 1992
2. Bromet EJ, Kotov R, Fochtmann LJ, et al: Diagnostic Shifts During the Decade Following First Admission for Psychosis. *American Journal of Psychiatry*:appi. *ajp*. 2011.11010048 v1, 2011
3. Spitzer RL, Williams JB, Gibbon M: The Structured Clinical Interview for DSM-III-R (SCID): history, validation, and description. *Arch Gen Psychiatry* 49:624–629, 1992
4. Schwartz JE, Fennig S, Tanenberg-Karant M, et al: Congruence of diagnoses 2 years after a first-admission diagnosis of psychosis. *Archives of General Psychiatry* 57:593, 2000
5. Brown AS, Susser ES, Jandorf L, et al: Social class of origin and cardinal symptoms of schizophrenic disorders over the early illness course. *Social psychiatry and psychiatric epidemiology* 35:53-60, 2000

6. Jablensky A, Sartorius N, Ernberg G, et al: Schizophrenia: manifestations, incidence and course in different cultures A World Health Organization Ten-Country Study. *Psychological Medicine Monograph Supplement* 20:1-97, 1992
7. Woerner MG, Mannuzza S, Kane JM: Anchoring the BPRS: an aid to improved reliability. *Psychopharmacology bulletin* 24:112-117, 1988
8. StataCorp: *Stata Statistical Software: Release 11*. 11, 2009
